# Supplementary material
Source: publisher figshare collection journal article supplement (https://tandf.figshare.com/ndownloader/files/17915999)
Supplement: Supplementary file 1 [file 17915999]

Supplementary Table S1: Included studies, sorted by central concept as indicated in the original articles.

| Reference | Central concept    | Jurisdiction | Aims and scope                                                                                                                             | Definitions                                                                                                                                      | Measures                                                                                                                                                                                                     |
|-----------|--------------------|--------------|--------------------------------------------------------------------------------------------------------------------------------------------|--------------------------------------------------------------------------------------------------------------------------------------------------|--------------------------------------------------------------------------------------------------------------------------------------------------------------------------------------------------------------|
| [1]       | Economic literacy  | Italy        | Compare indicators of economic literacy across countries                                                                                   | Knowledge of finance issues                                                                                                                      | Knowledge of financial concepts/systems, math knowledge                                                                                                                                                      |
| [2]       | Financial literacy | Sweden       | Examine relation FL and retirement planning                                                                                                | Knowledge of financial issues                                                                                                                    | Three questions to evaluate peoples' knowledge of numeracy/capacity to do calculations, understanding of inflation, understanding of risk diversification.                                                   |
| [3]       | Financial literacy | Sweden       | Comment on conceptualization of FL                                                                                                         | Situational definition                                                                                                                           | -                                                                                                                                                                                                            |
| [4]       | Financial literacy | US           | Financial education for older people                                                                                                       | -                                                                                                                                                | -                                                                                                                                                                                                            |
| [5]       | Financial literacy | US           | Examine definitions of FL, why it matters, where the public has accessed FL education, and difficulties encountered in providing education | Different definitions are explored, commonly focusing on ability to find financial information and ability to make financial decisions           | -                                                                                                                                                                                                            |
| [6]       | Financial literacy | US           | Examine literature to identify obstacles and propose an approach to develop more standardized measure of FL                                | "How well an individual can understand and use personal finance-related information"                                                             | Proposes that a measure need to include items on knowledge and application.                                                                                                                                  |
| [7]       | Financial literacy | Italy        | Associations FL, assets, etc. Tests relation between math skills in younger ages and FL in adults.                                         | Knowledge of financial issues                                                                                                                    | Three questions to evaluate peoples' knowledge of numeracy/capacity to do calculations, understanding of inflation, understanding of risk diversification.                                                   |
| [8]       | Financial literacy | US           | Assess literature, theoretical and empirical                                                                                               | "Peoples' ability to process economic information and make informed decisions about financial planning, wealth accumulation, debt, and pensions" | Three questions to evaluate peoples' knowledge of numeracy/capacity to do calculations, understanding of inflation, understanding of risk diversification. Also adds a subjective measure, self-assessed FL. |

|      |                           |               |                                                                                              |                                                                                                                                                                                                                                                                                                                                                                 |                                                                                                                                                                                                                         |
|------|---------------------------|---------------|----------------------------------------------------------------------------------------------|-----------------------------------------------------------------------------------------------------------------------------------------------------------------------------------------------------------------------------------------------------------------------------------------------------------------------------------------------------------------|-------------------------------------------------------------------------------------------------------------------------------------------------------------------------------------------------------------------------|
| [9]  | Financial literacy        | US            | Discuss how to measure FL and links to retirement planning                                   | Knowledge of financial issues                                                                                                                                                                                                                                                                                                                                   | Three questions to evaluate peoples' knowledge of numeracy/capacity to do calculations, understanding of inflation, understanding of risk diversification.                                                              |
| [10] | Financial literacy        | US            | FL in the US                                                                                 | Knowledge of financial issues                                                                                                                                                                                                                                                                                                                                   | Three questions to evaluate peoples' knowledge of numeracy/capacity to do calculations, understanding of inflation, understanding of risk diversification. Further questions on "advanced FL", which are more detailed. |
| [11] | Financial literacy        | International | Framework for PISA study                                                                     | Financial literacy is knowledge and understanding of financial concepts and risks, and the skills, motivation and confidence to apply such knowledge and understanding in order to make effective decisions across a range of financial contexts, to improve the financial well-being of individuals and society, and to enable participation in economic life. | Several domains                                                                                                                                                                                                         |
| [12] | Financial literacy        | Germany       | Describes how theoretical constructs can be validated through Rasch-modelling and SEM models | Knowledge/competence in financial matters                                                                                                                                                                                                                                                                                                                       |                                                                                                                                                                                                                         |
| [13] | Health insurance literacy | US            | Commentary on the US and international interest for health insurance literacy                | Understanding of health insurance                                                                                                                                                                                                                                                                                                                               | -                                                                                                                                                                                                                       |
| [14] | Health insurance literacy | US            | Study relationship between tobacco use and coverage of health insurance                      | Understand, compare, choose and use coverage                                                                                                                                                                                                                                                                                                                    | Factual questions on coverage options, plus demographics, experiences with health care system, risk taking, tobacco use, numeracy, health status, discount rates                                                        |

|      |                           |         |                                                                                                                    |                                                                                                                                                                                                                                                                   |                                                                                                                                                                        |
|------|---------------------------|---------|--------------------------------------------------------------------------------------------------------------------|-------------------------------------------------------------------------------------------------------------------------------------------------------------------------------------------------------------------------------------------------------------------|------------------------------------------------------------------------------------------------------------------------------------------------------------------------|
| [15] | Health insurance literacy | US      | Development of health insurance literacy educational tool                                                          | -                                                                                                                                                                                                                                                                 | -                                                                                                                                                                      |
| [16] | Health insurance literacy | Israel  | Identify disparities between Jews and Arabs in their knowledge and understanding of supplementary health insurance | Knowledge and understanding of health insurance coverage                                                                                                                                                                                                          | 8 questions on system knowledge (whether certain aspects are included or not), behaviors and use of health insurance and reasons for purchasing insurance              |
| [17] | Health insurance literacy | US      | To review literature and curricula on health insurance literacy                                                    | "The extent to which consumers can make informed purchase and use decisions", "knowledge, ability, and confidence to effectively choose and use health insurance"                                                                                                 | -                                                                                                                                                                      |
| [18] | Health insurance literacy | US      | Develop instrument                                                                                                 | -                                                                                                                                                                                                                                                                 | 10 items on knowledge of health insurance terminology, 17 items proficiency using the Medicare system.                                                                 |
| [19] | Health insurance literacy | US      | Evaluation of effects of educational programs                                                                      | -                                                                                                                                                                                                                                                                 | -                                                                                                                                                                      |
| [20] | Health insurance literacy | US      | Develop measure for HIL                                                                                            | "Consumers' ability to select and use private health insurance"                                                                                                                                                                                                   | Knowledge, information seeking, document literacy, cognitive skills, self-efficacy                                                                                     |
| [21] | Health insurance literacy | US      | Examine gaps in HIL that can impede young adults' access to timely care when changing insurance                    | Ability to obtain, process and understand health insurance information                                                                                                                                                                                            | Interview guide on why young adults change or use insurance, who is most vulnerable to churning, how churning affects continuity of care, factors facilitating access. |
| [22] | Health literacy           | Germany | Evaluate status quo of HL measurement                                                                              | Peoples' knowledge, motivation and competencies to access, understand, appraise and apply health information in order to make judgements and take decisions in everyday life concerning health care to maintain or improve quality of life during the life course | Reviews 17 instruments published 2009-2013                                                                                                                             |
| [23] | Health literacy           | US      | Present history of literacy and HL research and discuss definition and measurement                                 | Several discussed                                                                                                                                                                                                                                                 | -                                                                                                                                                                      |

|      |                 |         |                                                                               |                                                                                                                                                                       |                                                                                                                                                                            |
|------|-----------------|---------|-------------------------------------------------------------------------------|-----------------------------------------------------------------------------------------------------------------------------------------------------------------------|----------------------------------------------------------------------------------------------------------------------------------------------------------------------------|
| [24] | Health literacy | US      | Describe 10 attributes of health literate organizations                       | Several discussed                                                                                                                                                     | -                                                                                                                                                                          |
| [25] | Health literacy | Germany | Overview and synthesis of current understandings of HL in childhood and youth | Several definitions discussed                                                                                                                                         | -                                                                                                                                                                          |
| [26] | Health literacy | UK      | Interrogate the critical HL concept                                           | Defines critical HL as three domains: critical analysis of information, understanding of social determinants of health, and engagement in collective action.          | -                                                                                                                                                                          |
| [27] | Health literacy | UK      | To identify the optimal measurement for assessing HL in a clinical setting    | Based on Nutbeam's functional/interactive/critical HL                                                                                                                 | Several measures are assessed in terms of validity and coverage.                                                                                                           |
| [28] | Health literacy | US      | Develop a HL organizational assessment tool for health plans, and evaluate it | Focuses on functional HL                                                                                                                                              | Six evaluation areas: 1) information for members/navigation, 2) member services/communication, 3) web navigation, 4) forms, 5) nurse call line, 6) case/disease management |
| [29] | Health literacy | Spain   | Pilot assessment of literacy issues in a hospital setting                     | -                                                                                                                                                                     | Toolkit focusing on assessment of navigation, written, and oral communication.                                                                                             |
| [30] | Health literacy | US      | Description of an online resource for HL instruments                          | The degree to which individuals have the capacity to obtain, process and understand basic health information and services needed to make appropriate health decisions | The online toolshed contains 129 instruments                                                                                                                               |
| [31] | Health literacy | US      | Examine variations across three brief HL instruments                          | The capacity to obtain, process and understand the basic health information and access services needed to make appropriate health decisions                           | Compares 3 instruments: S-TOFHLA, REALM, BRIEF                                                                                                                             |
| [32] | Health literacy | US      | Present results from workshop on HL measures                                  | The degree to which individuals have the capacity to obtain, process and understand basic health information and services needed to make appropriate health decisions | Several measures presented                                                                                                                                                 |

|      |                 |          |                                                                                                                                                               |                                                                                                                                                                                                                                                                         |                              |
|------|-----------------|----------|---------------------------------------------------------------------------------------------------------------------------------------------------------------|-------------------------------------------------------------------------------------------------------------------------------------------------------------------------------------------------------------------------------------------------------------------------|------------------------------|
| [33] | Health literacy | Slovakia | Examine psychometric properties of Slovak version of HLQ                                                                                                      | Cognitive and social skills which determine the motivation and ability of individuals to gain access to, understand and use information in ways which promote and maintain good health                                                                                  | HLQ, Slovak version          |
| [34] | Health literacy | US       | Address HL among patients in a free clinic for the uninsured                                                                                                  | The ability to access, read and comprehend health information including numbers                                                                                                                                                                                         | -                            |
| [35] | Health literacy | US       | Estimate relationship low HL and difficulty obtaining care                                                                                                    | -                                                                                                                                                                                                                                                                       | Individual-oriented measures |
| [36] | Health literacy | US       | Discuss the different definitions of HL                                                                                                                       | Several definitions discussed                                                                                                                                                                                                                                           | -                            |
| [37] | Health literacy | Canada   | Explore differences and similarities in definitions                                                                                                           | Several definitions discussed                                                                                                                                                                                                                                           | -                            |
| [38] | Health literacy | US       | Conceptual analysis of HL                                                                                                                                     | A complex set of abilities needed to understand and use the dominant symbol systems of a culture – alphabets, numbers, visual icons – for personal and community development. The nature of these abilities, and the demand for them, vary from one context to another. | -                            |
| [39] | Health literacy | US       | Discuss need for attention to HL in insurance expansion (Obamacare) in the US                                                                                 | -                                                                                                                                                                                                                                                                       | -                            |
| [40] | Health literacy | Sweden   | Explore how HL is described and used in literature and synthesize                                                                                             | Describes different definitions/conceptualizations                                                                                                                                                                                                                      | -                            |
| [41] | Health literacy | Sweden   | Explore/describe womens' experiences of factors contributing to ability to make informed decisions in return to work                                          | Functional, interactive and critical skills to use and act on health information                                                                                                                                                                                        | -                            |
| [42] | Health literacy | US       | Overview of measurements of HL at the individual level                                                                                                        | -                                                                                                                                                                                                                                                                       | -                            |
| [43] | Health literacy | US       | Review of literature on oral and aural literacy and the oral exchange. Oral/aural literacy defined as speaking/listening skills among patients and providers. | Defines oral exchange as spoken communication between providers and patients.                                                                                                                                                                                           | -                            |

|      |                 |               |                                                                                                                                                                                                                                      |                                                                                                                                                                                                                                                                                                                                                            |                                                                                                                 |
|------|-----------------|---------------|--------------------------------------------------------------------------------------------------------------------------------------------------------------------------------------------------------------------------------------|------------------------------------------------------------------------------------------------------------------------------------------------------------------------------------------------------------------------------------------------------------------------------------------------------------------------------------------------------------|-----------------------------------------------------------------------------------------------------------------|
| [44] | Health literacy | Australia     | Discuss different developments of the HL concept                                                                                                                                                                                     | HL as risk or asset are discussed                                                                                                                                                                                                                                                                                                                          | -                                                                                                               |
| [45] | Health literacy | Australia     | Presents a model of social determinants of health where HL is a key health promotion outcome                                                                                                                                         | "Personal, cognitive and social skills which determine the ability of individuals to gain access to, understand, and use information to promote and maintain good health"                                                                                                                                                                                  | -                                                                                                               |
| [46] | Health literacy | Germany       | Identify, retrieve, analyze and assess available generic HL measurement instruments for children and adolescents                                                                                                                     | The skills, knowledge and motivation to access, understand and appraise health-related information in order to apply informed health-related decisions in everyday life                                                                                                                                                                                    | Overview of measures presented                                                                                  |
| [47] | Health literacy | Australia     | Develop a comprehensive measure of health literacy capable of diagnosing health literacy needs across individuals and organizations by utilizing perspectives from the general population, patients, practitioners and policymakers. | Starts with the WHO 1998 definition: "the cognitive and social skills which determine the motivation and ability of individuals to gain access to, understand and use information in ways which promote and maintain good health"                                                                                                                          | HLQ, comprising 9 scales and 44 items. Scales correspond to Nutbeams distinctions.                              |
| [48] | Health literacy | Australia     | Discuss HL in relation to health promotion                                                                                                                                                                                           | Accessing, understanding and using information to make health decisions                                                                                                                                                                                                                                                                                    | -                                                                                                               |
| [49] | Health literacy | Austria       | Differences in measuring HL for purposes of public health and for healthcare services. Presents EU data.                                                                                                                             | Health literacy is linked to literacy and entails peoples' knowledge, motivation and competences to access, understand, appraise, and apply health information in order to make judgments and take decisions in everyday life concerning healthcare, disease prevention and health promotion to maintain or improve quality of life during the life course | HLS-EU. 47 items in total, developed also into two shorter variants, with 16 and 6 items, using Rasch modeling. |
| [50] | Health literacy | International | Present results from EU study on HL using the HLS-EU scale                                                                                                                                                                           | Health literacy is linked to literacy and entails peoples' knowledge, motivation and competences to access, understand, appraise, and apply health information in order to make judgments and take decisions in everyday life concerning                                                                                                                   | HLS-EU, also compared with NVS                                                                                  |

|      |                 |                 |                                                                                  |                                                                                                                                                                                                                                                                                                                                                                                                                                                                                                                                                                 |                                                                                                      |
|------|-----------------|-----------------|----------------------------------------------------------------------------------|-----------------------------------------------------------------------------------------------------------------------------------------------------------------------------------------------------------------------------------------------------------------------------------------------------------------------------------------------------------------------------------------------------------------------------------------------------------------------------------------------------------------------------------------------------------------|------------------------------------------------------------------------------------------------------|
|      |                 |                 |                                                                                  | healthcare, disease prevention and health promotion to maintain or improve quality of life during the life course                                                                                                                                                                                                                                                                                                                                                                                                                                               |                                                                                                      |
| [51] | Health literacy | International   | Proposes a new definition                                                        | Proposes orientation for a new definition but offers no such definition                                                                                                                                                                                                                                                                                                                                                                                                                                                                                         | -                                                                                                    |
| [52] | Health literacy | US              | Describes a process of online discussion with HL professionals about measurement | Discusses HL as both skill and health behavior.                                                                                                                                                                                                                                                                                                                                                                                                                                                                                                                 | Discusses the various aspects needed to be included in a comprehensive measure of HL.                |
| [53] | Health literacy | US              | Discuss the need for a new consensus-based measure of HL                         | Development of definitions are discussed. Promotes the def from the Calgary Charter on Health Literacy: "Health literacy allows the public and personnel working in all health-related contexts to find, understand, evaluate, communicate, and use information. Health literacy is the use of a wide range of skills that improve the ability of people to act on information in order to live healthier lives. These skills include reading, writing, listening, speaking, numeracy, and critical analysis, as well as communication and interaction skills." | Several measures discussed and compared                                                              |
| [54] | Health literacy | US              | Evaluate conceptual and empirical distinctiveness of HL                          | The ability to obtain, process and understand basic information and services needed to make appropriate health decisions                                                                                                                                                                                                                                                                                                                                                                                                                                        | 3 measures of HL, focused on individual skills (REALM, S-TOFHLA, NVS). 6 tests of cognitive ability. |
| [55] | Health literacy | US              | Discussion about problems with restricted definitions                            | Discusses definitions, argues for a broad concept including institutional and system norms, policies and regulations                                                                                                                                                                                                                                                                                                                                                                                                                                            | -                                                                                                    |
| [56] | Health literacy | US              | Discuss HL and needs for development                                             | -                                                                                                                                                                                                                                                                                                                                                                                                                                                                                                                                                               | -                                                                                                    |
| [57] | Health literacy | US              | Provide toolkit for assessing and improving hospital environments                | -                                                                                                                                                                                                                                                                                                                                                                                                                                                                                                                                                               | Toolkit presented, same as [29]                                                                      |
| [58] | Health literacy | US              | Presents definitions, statistics and demographics                                | -                                                                                                                                                                                                                                                                                                                                                                                                                                                                                                                                                               | -                                                                                                    |
| [59] | Health literacy | The Netherlands | Provide overview of HL definitions                                               | Explores different definitions                                                                                                                                                                                                                                                                                                                                                                                                                                                                                                                                  | -                                                                                                    |

|      |                 |                 |                                                                                                                                                                                                                     |                                                                                                                                                                                                                                                                                                                                                                                                                                  |                                                                                            |
|------|-----------------|-----------------|---------------------------------------------------------------------------------------------------------------------------------------------------------------------------------------------------------------------|----------------------------------------------------------------------------------------------------------------------------------------------------------------------------------------------------------------------------------------------------------------------------------------------------------------------------------------------------------------------------------------------------------------------------------|--------------------------------------------------------------------------------------------|
| [60] | Health literacy | The Netherlands | Review definitions and models on HL to develop integrated definition and conceptual model                                                                                                                           | 17 definitions was combined into a new "all inclusive" definition: "Health literacy is linked to literacy and entails peoples' knowledge, motivation and competences to access, understand, appraise, and apply health information in order to make judgments and take decisions in everyday life concerning healthcare, disease prevention and health promotion to maintain or improve quality of life during the life course." | -                                                                                          |
| [61] | Health literacy | UK              | Analyze the concept of critical health literacy                                                                                                                                                                     | Critical HL defined as "cognitive and skills development outcomes which are oriented towards supporting effective social and political action as well as individual action"                                                                                                                                                                                                                                                      | -                                                                                          |
| [62] | Health literacy | International   | Distil evidence and identify policy implications and action points                                                                                                                                                  | HL as a relational, interactive concept covering both individual skills and abilities, and demands and complexity of the context                                                                                                                                                                                                                                                                                                 | -                                                                                          |
| [63] | Health literacy | Canada          | Investigate strategies/interventions, contextual factors and mechanisms that influence the capacity of organizations to plan, implement and sustain health literacy activities. Review on planning of interventions | "The degree to which people are able to access, understand appraise, and communicate information to engage with the demands of different health contexts in order to promote and maintain good health across the life course"                                                                                                                                                                                                    | -                                                                                          |
| [64] | Health literacy | Sweden          | Testing of translated version of Japanese communicative and critical HL measure                                                                                                                                     | Functional, interactive and critical HL                                                                                                                                                                                                                                                                                                                                                                                          | Japanese C & C HL scale, 5 items measuring views on communication and critical HL aspects. |
| [65] | Health literacy | Sweden          | Determine functional and comprehensive HL in refugees                                                                                                                                                               | Functional and comprehensive HL (involving using information for disease prevention and health promotion)                                                                                                                                                                                                                                                                                                                        | Swedish functional HL scale, HLS-EU-Q16                                                    |
| [66] | Health literacy | Sweden          | Develop Swedish functional HL scale and test it                                                                                                                                                                     | Functional HL: skills necessary for being compliant with medication regimens, etc.                                                                                                                                                                                                                                                                                                                                               | Swedish functional HL scale, based on Nutbeams definition, five items                      |



|      |                                             |           |                                                                                                                                             |                                                                                                                                                                                                                                                                                                                                                                                                                                                                                                                                                                                                                                                               |                                                                                                                                                                                   |
|------|---------------------------------------------|-----------|---------------------------------------------------------------------------------------------------------------------------------------------|---------------------------------------------------------------------------------------------------------------------------------------------------------------------------------------------------------------------------------------------------------------------------------------------------------------------------------------------------------------------------------------------------------------------------------------------------------------------------------------------------------------------------------------------------------------------------------------------------------------------------------------------------------------|-----------------------------------------------------------------------------------------------------------------------------------------------------------------------------------|
| [67] | Health literacy / financial literacy        | US        | To examine the association of health and financial literacy with decision making in older adults                                            | "The ability to access, understand and utilize health and financial information and concepts in ways that promote good health and financial outcomes"                                                                                                                                                                                                                                                                                                                                                                                                                                                                                                         | 9 items on HL, 23 on FL. Mostly knowledge of specific issues and details.                                                                                                         |
| [68] | Health literacy / health insurance literacy | US        | Assess impact of HL and HIL on health insurance status and access to health care services for Spanish-speaking communities in Massachusetts | HIL: Ability to seek, obtain and understand health insurance plans and use to seek appropriate health services                                                                                                                                                                                                                                                                                                                                                                                                                                                                                                                                                | Terminology, cognitive skills, plus 18-item scale on HL. Interview questions on barriers/facilitators to health care access                                                       |
| [69] | Health literacy / legal capability          | Canada    | Literature review of health literacy and legal capability, and health information practices                                                 | General literacy: "The ability to understand and use reading, writing, speaking and other forms of communication as ways to participate in society and achieve one's goals and potential". Health literacy: The cognitive and social skills which determinate the motivation and ability of individuals to gain access to, understand, and use information in ways which promote and maintain good health" (WHO). Legal capability/literacy: Abilities that a person needs to deal effectively with law-related issues ... beyond knowledge of the law, to encompass skills like the ability to communicate plus attitudes like confidence and determination. | Health literacy is divided into functional, interactive and critical HL (Nutbeam). Legal capability into knowledge, skills and competence/psychological readiness (Law for life). |
| [70] | Legal capability                            | Canada    | Online scan of existing research on legal capability                                                                                        | -                                                                                                                                                                                                                                                                                                                                                                                                                                                                                                                                                                                                                                                             | -                                                                                                                                                                                 |
| [71] | Legal capability                            | Canada    | Summarized presentation of strategies to improve legal capability                                                                           | "The knowledge, skills, and personal characteristics and circumstances that affect what people can do to resolve legal problems"                                                                                                                                                                                                                                                                                                                                                                                                                                                                                                                              | -                                                                                                                                                                                 |
| [72] | Legal capability                            | UK        | Description of legal capability                                                                                                             | Abilities that a person needs to deal effectively with law-related issues                                                                                                                                                                                                                                                                                                                                                                                                                                                                                                                                                                                     | -                                                                                                                                                                                 |
| [73] | Legal capability                            | Australia | Examine three reasons for not taking legal action: "didn't know what to                                                                     | The personal characteristics or competencies necessary for an individual to resolve legal problems effectively                                                                                                                                                                                                                                                                                                                                                                                                                                                                                                                                                | -                                                                                                                                                                                 |

|      |                                  |           |                                                                                                                                                      |                                                                                                                                                                                                                                                                                |                                                                                               |
|------|----------------------------------|-----------|------------------------------------------------------------------------------------------------------------------------------------------------------|--------------------------------------------------------------------------------------------------------------------------------------------------------------------------------------------------------------------------------------------------------------------------------|-----------------------------------------------------------------------------------------------|
|      |                                  |           | do", "would be too stressful", "would cost too much"                                                                                                 |                                                                                                                                                                                                                                                                                |                                                                                               |
| [74] | Legal capability                 | Australia | Examines whether multiple disadvantage is associated with lower legal capability to resolve legal problems. Examines the use of self-help resources. | The personal characteristics or competencies needed to effectively resolve legal problems. Includes personal skills, abilities and resources. Legal capability is also affected by systemic and structural factors, such as geographic location and local service environment. | Disadvantage measured with nine indicators. Six types of legal problem-solving strategies.    |
| [75] | Legal empowerment                | US        | Literature review on legal empowerment                                                                                                               | Giving people the power to understand and use the law                                                                                                                                                                                                                          | -                                                                                             |
| [76] | Legal literacy                   | UK        | Evaluate outcomes for practice of teaching, learning and assessment of law in social work education and medical education                            | Knowledge of laws and rules relevant to professional work                                                                                                                                                                                                                      | -                                                                                             |
| [77] | Legal literacy / health literacy | Canada    | Debate piece based on literature on challenges associated with rights to access to health care for migrants                                          | -                                                                                                                                                                                                                                                                              | -                                                                                             |
| [78] | Literacy                         | UK        | Discussion about the development of "New Literacy Studies"                                                                                           | Literacy as a social practice rather than individual skill                                                                                                                                                                                                                     | -                                                                                             |
| [79] | Public health literacy           | US        | Define public health literacy                                                                                                                        | "The degree to which individuals and groups can obtain, process, understand, evaluate, and act on information needed to make public health decisions that benefit the community."                                                                                              | -                                                                                             |
| [80] | Social security literacy         | US        | Knowledge of insurance rules and relation to retirement/savings decisions                                                                            | Knowledge of rules and systems                                                                                                                                                                                                                                                 | Knowledge of rules and how knowledge was acquired, financial literacy, demographics           |
| [81] | Social security literacy         | US        | Explore hispanics' understanding of social security and retirement planning                                                                          | Knowledge of social security programs and benefits, and preferred ways of receiving program-related information                                                                                                                                                                | Qualitative questions in focus groups, and quiz-like survey questions on knowledge of systems |
| [82] | Social security literacy         | US        | Knowledge of insurance rules and relation to retirement/savings decisions                                                                            | Knowledge of rules and systems                                                                                                                                                                                                                                                 | Knowledge of rules and how knowledge was acquired, financial literacy, demographics           |

|      |                                               |    |                                                                           |                    |                                                                                     |
|------|-----------------------------------------------|----|---------------------------------------------------------------------------|--------------------|-------------------------------------------------------------------------------------|
| [83] | Social security literacy / financial literacy | US | Knowledge of insurance rules and relation to retirement/savings decisions | Knowledge of rules | Knowledge of rules and how knowledge was acquired, financial literacy, demographics |
|------|-----------------------------------------------|----|---------------------------------------------------------------------------|--------------------|-------------------------------------------------------------------------------------|

## References

1. Jappelli, T., *Economic Literacy: An International Comparison*. The Economic Journal, 2010. **120**(548): p. F429-F451.
2. Almenberg, J. and J. S  ve-S  derbergh, *Financial literacy and retirement planning in Sweden*. Journal of Pension Economics and Finance, 2011. **10**(4): p. 585-598.
3. Bay, C., B. Catas  s, and G. Johed, *Situating financial literacy*. Critical Perspectives on Accounting, 2014. **25**(1): p. 36-45.
4. Cutler, N.E., *Quantitative Financial Literacy: The Signal and the Noise*. Journal of Financial Service Professionals, 2013. **67**(2): p. 24-28.
5. Faulkner, A.E., *A Systematic Review of Financial Literacy as a Termed Concept: More Questions Than Answers*. Journal of Business & Finance Librarianship, 2015. **20**(1-2): p. 7-26.
6. Huston, S.J., *Measuring Financial Literacy*. Journal of Consumer Affairs, 2010. **44**(2): p. 296-316.
7. Jappelli, T. and M. Padula, *Investment in financial literacy and saving decisions*. Journal of Banking and Finance, 2013. **37**(8): p. 2779-2792.
8. Lusardi, A. and O.S. Mitchell, *The economic importance of financial literacy: Theory and evidence*. Journal of Economic Literature, 2014. **52**(1): p. 5-44.
9. Lusardi, A. and O.S. Mitchell, *Financial literacy around the world: an overview*. Journal of Pension Economics and Finance, 2011. **10**(4): p. 497-508.
10. Lusardi, A., *Financial Literacy: An Essential Tool for Informed Consumer Choice?* National Bureau of Economic Research Working Paper Series, 2008. **No. 14084**.
11. OECD, *PISA 2012 Assessment and Analytical Framework: Mathematics, Reading, Science, Problem Solving and Financial Literacy* 2013, OECD.
12. Schuhen, M. and S. Sch  rkmann, *Construct validity of financial literacy*. International Review of Economics Education, 2014. **16**(PA): p. 1-11.
13. Barnes, A.J. and Y. Hanoch, *Knowledge and understanding of health insurance: challenges and remedies*. Israel journal of health policy research, 2017. **6**(1): p. 40-40.
14. Braun, R.T., Y. Hanoch, and A.J. Barnes, *Tobacco use and health insurance literacy among vulnerable populations: implications for health reform*. BMC health services research, 2017. **17**(1): p. 729-729.
15. Brown, V., *Infusing Adult Education Principles Into a Health Insurance Literacy Program*. Health Promotion Practice, 2017. **19**(2): p. 240-245.
16. Green, M.S., et al., *A national survey of ethnic differences in knowledge and understanding of supplementary health insurance*. Israel Journal of Health Policy Research, 2017. **6**(1).
17. Kim, J., B. Braun, and A.D. Williams, *Understanding health insurance literacy: A literature review*. Family and Consumer Sciences Research Journal, 2013. **42**(1): p. 3-13.

18. McCormack, L., et al., *Health insurance literacy of older adults*. Journal of Consumer Affairs, 2009. **43**(2): p. 223-248.
19. Myerson, R. *Health Insurance Literacy and Health Insurance Choices: Evidence from Affordable Care Act Navigator Programs*. 2018.
20. Paez, K.A., et al., *Development of the health insurance literacy measure (HILM): Conceptualizing and measuring consumer ability to choose and use private health insurance*. Journal of Health Communication, 2014. **19**: p. 225-239.
21. Tilley, L., J. Yarger, and C. Brindis, *Young Adults Changing Insurance Status: Gaps in Health Insurance Literacy*. Journal of Community Health, 2018. **43**(4): p. 680-687.
22. Altin, S.V., et al., *The evolution of health literacy assessment tools: A systematic review*. BMC Public Health, 2014. **14**(1).
23. Berkman, N.D., T.C. Davis, and L. McCormack, *Health Literacy: What Is It?* Journal of Health Communication, 2010. **15**(sup2): p. 9-19.
24. Brach, C., et al., *Ten attributes of health literate health care organizations*. NAM Perspectives, 2012.
25. Bröder, J., et al., *Health literacy in childhood and youth: A systematic review of definitions and models*. BMC Public Health, 2017. **17**(1).
26. Chinn, D., *Critical health literacy: A review and critical analysis*. Social Science & Medicine, 2011. **73**(1): p. 60-67.
27. Duell, P., et al., *Optimal health literacy measurement for the clinical setting: A systematic review*. Patient Education and Counseling, 2015. **98**(11): p. 1295-1307.
28. Gazmararian, J.A., et al., *The Development of a Health Literacy Assessment Tool for Health Plans*. Journal of Health Communication, 2010. **15**(sup2): p. 93-101.
29. Groene, R.O. and R.E. Rudd, *Results of a feasibility study to assess the health literacy environment: navigation, written, and oral communication in 10 hospitals in Catalonia, Spain*. Journal of Communication in Healthcare, 2011. **4**(4): p. 227-237.
30. Harnett, S., *Health Literacy Tool Shed: A Source for Validated Health Literacy Instruments*. Journal of Consumer Health on the Internet, 2017. **21**(1): p. 78-86.
31. Haun, J.N., et al., *Measurement variation across health literacy assessments: implications for assessment selection in research and practice*. Journal of health communication, 2012. **17 Suppl 3**(141-159).
32. Hernandez, L., *Measures of health literacy. Workshop summary*. 2009, The National Academies Press: Washington D.C.
33. Kolarcik, P., et al., *Structural properties and psychometric improvements of the Health Literacy Questionnaire in a Slovak population*. International Journal of Public Health, 2017. **62**(5): p. 591-604.
34. Lane, S.D., et al., *Filling out the forms: Health literacy among the uninsured*. Social Work in Health Care, 2017. **56**(8): p. 686-699.
35. Levy, H. and A. Janke, *Health Literacy and Access to Care*. Journal of health communication, 2016. **21 Suppl 1**(Suppl): p. 43-50.
36. Mackert, M., et al., *The Many Health Literacies: Advancing Research or Fragmentation?* Health Communication, 2015. **30**(12): p. 1161-1165.
37. Malloy-Weir, L.J., et al., *A review of health literacy: Definitions, interpretations, and implications for policy initiatives*. Journal of Public Health Policy, 2016. **37**(3): p. 334-352.
38. Mancuso, J.M., *Health literacy: A concept/dimensional analysis*. Nursing & Health Sciences, 2008. **10**(3): p. 248-255.
39. Martin, L.T. and R.M. Parker, *Insurance Expansion and Health Literacy*. JAMA, 2011. **306**(8): p. 874-875.

40. Mårtensson, L. and G. Hensing, *Health literacy – a heterogeneous phenomenon: a literature review*. Scandinavian Journal of Caring Sciences, 2012. **26**(1): p. 151-160.
41. Mårtensson, L. and G. Hensing, *Experiences of factors contributing to women's ability to make informed decisions about the process of rehabilitation and return to work: A focus group study*. Work, 2012. **43**(2): p. 237-248.
42. Nguyen, T.H., M.K. Paasche-Orlow, and L.A. McCormack, *The State of the Science of Health Literacy Measurement*, in *Studies in Health Technology and Informatics*. 2017. p. 17-33.
43. Nouri, S.S. and R.E. Rudd, *Health literacy in the "oral exchange": An important element of patient-provider communication*. Patient Education and Counseling, 2015. **98**(5): p. 565-571.
44. Nutbeam, D., *The evolving concept of health literacy*. Social Science and Medicine, 2008. **67**(12): p. 2072-2078.
45. Nutbeam, D., *Health literacy as a public health goal: A challenge for contemporary health education and communication strategies into the 21st century*. Health Promotion International, 2000. **15**(3): p. 259-267.
46. Okan, O., et al., *Generic health literacy measurement instruments for children and adolescents: a systematic review of the literature*. BMC Public Health, 2018. **18**(1): p. 166.
47. Osborne, R.H., et al., *The grounded psychometric development and initial validation of the Health Literacy Questionnaire (HLQ)*. BMC Public Health, 2013. **13**(1): p. 658.
48. Pearson, A. and M. Saunders, *Health literacy revisited: What do we mean and why does it matter?* Health Promotion International, 2009. **24**(3): p. 285-296.
49. Pelikan, J. and K. Ganahl, *Measuring health literacy in general populations: Primary findings from the HLS-EU Consortium's health literacy assessment effort*, in *Health Literacy. New Directions in Research, Theory and Practice*, R. Logan and E. Siegel, Editors. 2017, IOS Press: Amsterdam.
50. HLS-EU Consortium, *Comparative report on health literacy in eight eu member states*. 2012.
51. Pleasant, A., et al., *Considerations for a New Definition of Health Literacy*. NAM Perspectives, 2016.
52. Pleasant, A. and J. McKinney, *Coming to consensus on health literacy measurement: An online discussion and consensus-gauging process*. Nursing Outlook, 2011. **59**(2): p. 95-106.e1.
53. Pleasant, A., *Advancing health literacy measurement: A pathway to better health and health system performance*. Journal of Health Communication, 2014. **19**(12): p. 1481-1496.
54. Reeve, C.L. and D. Basalik, *Is health literacy an example of construct proliferation? A conceptual and empirical evaluation of its redundancy with general cognitive ability*. Intelligence, 2014. **44**(1): p. 93-102.
55. Rudd, R., *Health literacy: Insights and issues*, in *Health Literacy. New Directions in Research, Theory and Practice*, R. Logan and E. Siegel, Editors. 2017, IOS Press: Amsterdam.
56. Rudd, R.E., *Needed action in health literacy*. Journal of Health Psychology, 2013. **18**(8): p. 1004-1010.

57. Rudd, R.E. and J.E. Anderson, *The Health Literacy Environment of Hospitals and Health Centers*. 2006, National Center for the Study of Adult Learning and Literacy and Health and Adult Literacy and Learning Initiative, Harvard School of Public Health: Boston.
58. Schnitzer, A.E., M. Rosenzweig, and B. Harris, *Health Literacy: A Survey of the Issues and Solutions*. Journal of Consumer Health on the Internet, 2011. **15**(2): p. 164-179.
59. Sørensen, K. and A. Pleasant, *Understanding the conceptual importance of the differences among health literacy definitions*, in *Health Literacy: New Directions in Research, Theory and Practice*. 2017. p. 3-14.
60. Sørensen, K., et al., *Health literacy and public health: A systematic review and integration of definitions and models*. BMC Public Health, 2012. **12**(1).
61. Sykes, S., et al., *Understanding critical health literacy: A concept analysis*. BMC Public Health, 2013. **13**(1).
62. World Health Organization, *Health literacy. The solid facts*. 2013.
63. Willis, C.D., et al., *Improving organizational capacity to address health literacy in public health: a rapid realist review*. Public Health, 2014. **128**(6): p. 515-524.
64. Wångdahl, J.M. and L.I. Mårtensson, *The Communicative and Critical Health Literacy Scale – Swedish Version*. Scandinavian Journal of Public Health, 2014. **42**(1): p. 25-31.
65. Wångdahl, J., et al., *Health literacy among refugees in Sweden – a cross-sectional study*. BMC Public Health, 2014. **14**(1): p. 1030.
66. Wångdahl, J.M. and L.I. Mårtensson, *Measuring health literacy - the Swedish Functional Health Literacy scale*. Scandinavian Journal of Caring Sciences, 2015. **29**(1): p. 165-172.
67. James, B.D., et al., *The impact of health and financial literacy on decision making in community-based older adults*. Gerontology, 2012. **58**(6): p. 531-539.
68. Edward, J., et al., *The impact of health and health insurance literacy on access to care for Hispanic/Latino communities*. Public Health Nursing, 2018. **35**(3): p. 176-183.
69. Brousalis, K., *Don't smoke, don't be poor, read before signing. Linking health literacy and legal capability*. 2015, CLEO Centre for Research & Innovation: Toronto.
70. Brousalis, K., *Building an understanding of legal capability: An online scan of legal capability research*. 2016, CLEO Centre for Research & Innovation: Toronto.
71. Brousalis, K., *A framework for Ontario: introducing a working legal capability matrix*. 2016, CLEO Centre for Research & Innovation: Toronto.
72. Jones, M., *Legal Capability*. 2010, Advice Services Alliance: London.
73. McDonald, H.M. and J. People, *Legal capability and inaction for legal problems: knowledge, stress and cost*. 2014, Law and Justice Foundation of New South Wales: Sydney.
74. McDonald, H.M. and Z. Wei, *How people solve legal problems: level of disadvantage and legal capability*. 2016, Law and Justice Foundation of New South Wales: Sydney.

75. Goodwin, L. and V. Maru, *What Do We Know about Legal Empowerment? Mapping the Evidence*. Hague Journal on the Rule of Law, 2017. **9**(1): p. 157-194.
76. Preston-Shoot, M. and J. McKimm, *Exploring UK medical and social work students' legal literacy: comparisons, contrasts and implications*. Health & Social Care in the Community, 2013. **21**(3): p. 271-282.
77. Vissandjée, B., W.E. Short, and K. Bates, *Health and legal literacy for migrants: twinned strands woven in the cloth of social justice and the human right to health care*. BMC International Health and Human Rights, 2017. **17**(1): p. 10.
78. Street, B., *What's "new" in New Literacy Studies? Critical approaches to literacy in theory and practice*. **5**(2).
79. Freedman, D.A., et al., *Public Health Literacy Defined*. American Journal of Preventive Medicine, 2009. **36**(5): p. 446-451.
80. Greenwald, M., et al., *What do people know about social security?* 2010, Financial Literacy Center: Washington DC.
81. Rabinovich, L., J. Peterson, and B.A. Smith, *Hispanics' understanding of Social Security and the implications for retirement security: A qualitative study*. Social Security Bulletin, 2017. **77**(3): p. 1-14.
82. Yoong, J., L. Rabinovich, and S.H. Wah, *What do people know about social security?* 2017, Center for Economic and Social Research: Los Angeles.
83. Benitez-Silva, H., B. Demiralp, and Z. Liu, *Social Security Literacy and Retirement Well-Being*. 2009, Michigan Retirement Research Center
